# Supplementary material for: Opportunities for Gene and Environment Research in Cancer: An Updated Review of NCI's Extramural Grant Portfolio
Source: Oxford University Press journal article supplement (doi:10.1158/1055-9965.epi-20-1264), 2020-12-16
Supplement: 10559965epi201264-sup-250137_3_supp_6759348_qk8nl5.xlsx [file 10559965epi201264-sup-250137_3_supp_6759348_qk8nl5.xlsx]

## Sheet: Search Terms
Supplementary Table 1. Genetic and Environmental Search Terms
Genetic Search Terms	Environmental Search Terms
Biomarker	Adductome
DNA	Adductomics
Epigenetic	Adducts
Exome	Alcohol
Exome Analysis	Bacteria
Familial	Behavioral
Families	Benzene
Family	Benzidine
Gene	Bisphenol A
Gene Mapping	BPA
Genes	Carcinogen
Genetic	Chemical
Genetic Testing	Climate
Genomic	Cotinine
Germline	Diesel Exhaust
GWAS	Diet
High Risk	Dioxin
High-throughput sequencing	Drugs
Kindred	E-cigarettes
Kindreds	Education
Massively parallel sequencing	Electromagnetic Field
Next Generation Sequencing	EMF
Pedigree	ENL
Pedigrees	Enterolactone
Rare variants	EWAS
Relatives	Exposome
Sequenced the entire exome	Genistein
Sequenced the entire exomes	Herbicide
Sequenced the exome	Infection
Sequenced the exomes	Insecticide
Sequencing	Medication
Sequencing the exome	Metabolome
Sequencing the exomes	Metabolomics
Sib-pair	Metal
Sib-pairs	Microbiome
Single Nucleotide Polymorphism	Microbiota
SNP	Microflora
Somatic	Obesity
Whole Exome Sequencing	Organochlorine
Whole Genome Sequencing	Organophosphorus
	PAH
	PBDE
	PCB
	Perfluorinated Compounds
	Perfluoro-octanoic acid
	Personal
	Pesticide
	PFOA
	Phenol
	Phthalate
	Physical Activity
	Physical Inactivity
	Phytoestrogen
	Phytoestrogens
	Polybrominated Diphenyl Ether
	Polychlorinated biphenyl
	Polychlorinated dibenzofurans
	Polycyclic aromatic hydrocarbons
	Polyvinyl Chloride
	PVC
	Radiation
	Smoking
	Social Determinants
	Social Environment
	Solvent
	Stress
	Tobacco
	Vinyl Chloride
	Virus
	Weight
